# Supplementary material
Source: Springer Nature journal article supplement (https://www.springermedizin.de/resource/supplementary/12985_2012_2009_MOESM2_ESM.pdf/9610754)

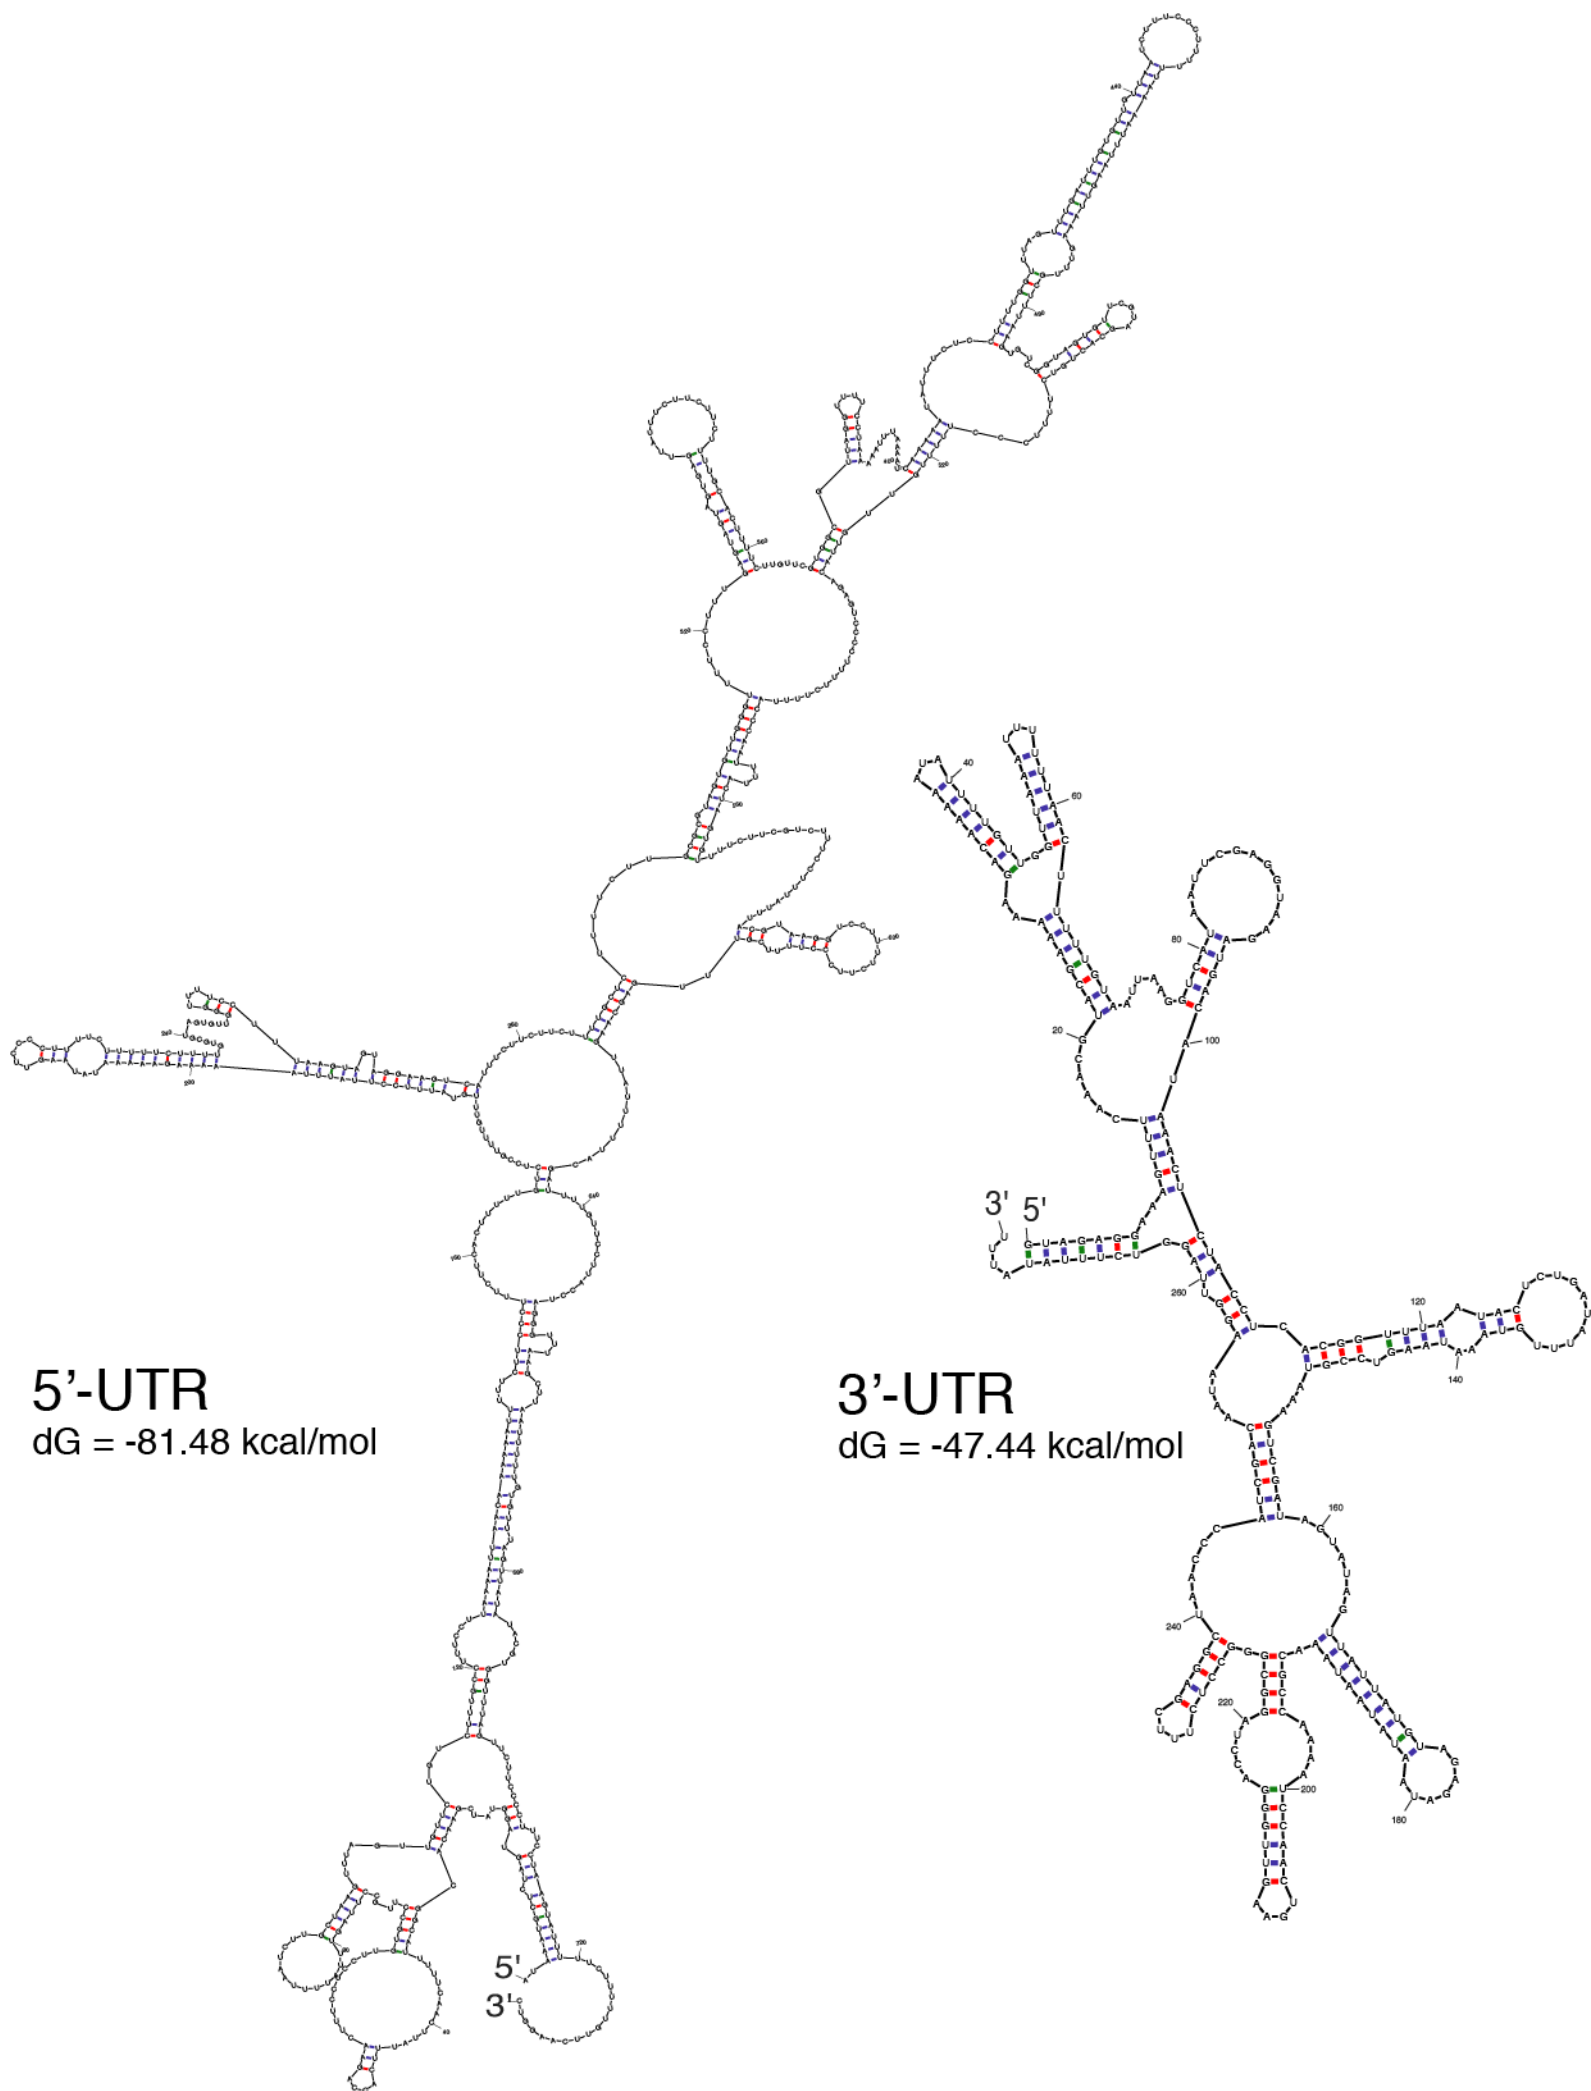

**5'-UTR**

dG = -81.48 kcal/mol

**3'-UTR**

dG = -47.44 kcal/mol

Supplement: MOESM2 [file 9610754]
